# Supplementary material for: Facile fabrication of crack-free photonic crystals with enhanced color contrast and low angle dependence
Source: Royal Society of Chemistry journal article supplement (doi:10.1039/c7tc01549f), 2017-01-01
Supplement: c7tc01549f1.pdf [file c7tc01549f1.pdf]

## Supporting Information

### Facile fabrication of crack-free photonic crystals with enhanced color contrast and low angle dependence

Bo Yi,<sup>a</sup> Huifang Shen<sup>\*a</sup>

a. School of Chemistry and Chemical Engineering, South China University of Technology, Guangzhou 510640, P. R. China

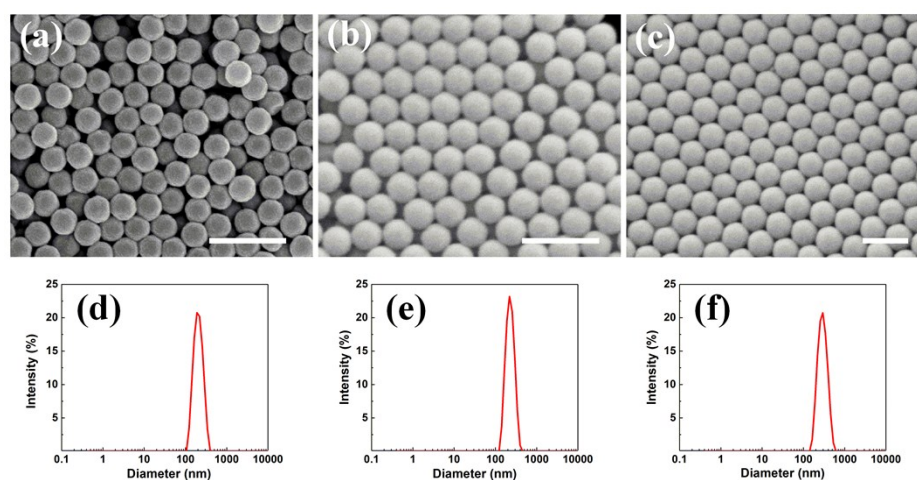

**Fig. S1** SEM images and corresponding size distributions of as-prepared PS NPs with different diameters: (a and d) 162 nm, (b and e) 186 nm, (c and f) 252 nm. The scale bar is 500 nm.

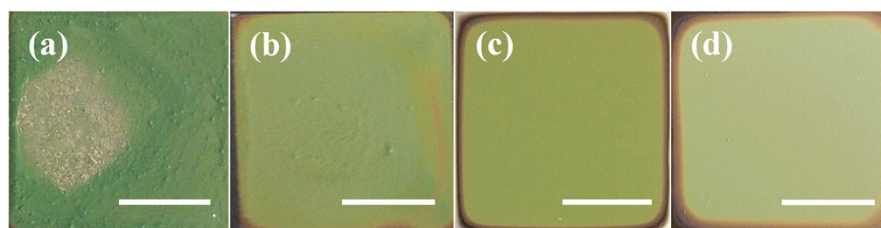

**Fig. S2** Photographs of PC films assembled with different mass ratios of APTES to PS@PDA NPs: (a) 0:5, (b) 0.5:5, (c) 1:5, (d) 2:5. The PS core sizes are 186 nm, the scale bar is 1 cm.

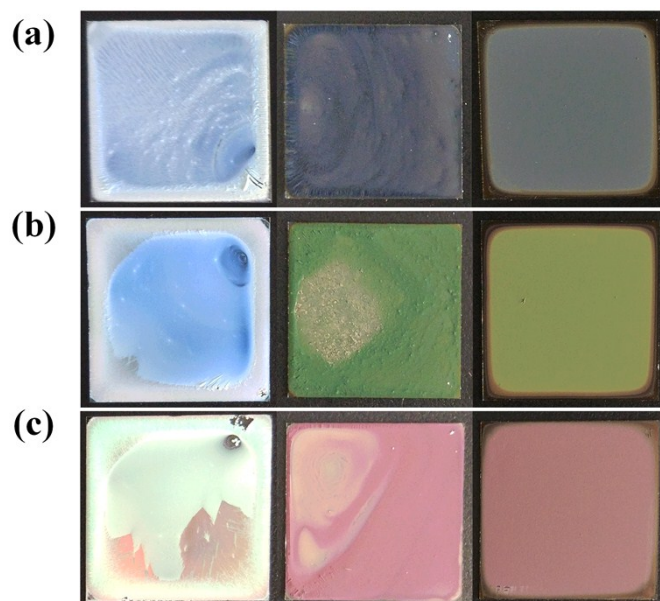

**Fig. S3** Digital photographs of PC films fabricated by PS NPs, PS@PDA NPs and PS@PDA/APTES hybrid, the sizes of PS/PS core are (a) 162 nm, (b) 186 nm and (c) 252 nm, respectively.

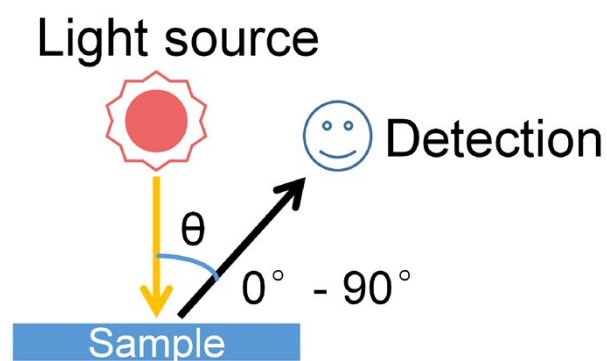

**Fig. S4** The schematic drawing of viewing samples under different angles ( $\theta$ ) and the measurement system of angle-resolved reflectance spectrum.

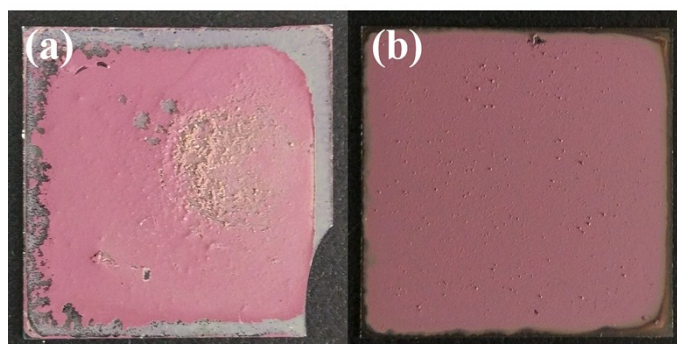

**Fig. S5** (a) PS@PDA film and (b) PS@PDA/APTES film after 5 min hose stream test and a followed drying process. The PS core size is 252 nm.

**Table S1** The diameters of PS/PS core of PS NPs, PS@PDA NPs and PS@PDA/APTES hybrid with corresponding reflection peak wavelengths ( $\lambda_{\max}$ ) of PCs.

| Diameters of PS/PS<br>core (nm) | $\lambda_{\max}$ (nm) |            |                        |
|---------------------------------|-----------------------|------------|------------------------|
|                                 | PS NPs                | PS@PDA NPs | PS@PDA/APTES<br>hybrid |
| 162                             | 400                   | 448        | 464                    |
| 186                             | 454                   | 522        | 538                    |
| 252                             | 606                   | 652        | 640                    |
